## Expression-of-concern

# Expression of Concern: Protective effect of *Asarum sieboldii* essential oil on ovalbumin induced allergic rhinitis in rat

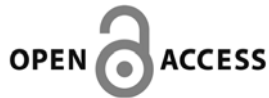

The Editorial Office has been made aware of potential issues surrounding the scientific validity of this paper, hence has issued an expression of concern to notify readers whilst the Editorial Office investigates.

Downloaded from [http://port.silverchair.com/bioscierep/article-pdf/40/6/BSR-20191370\\_EOC/885136/bsr-2019-1370-eoc.pdf](http://port.silverchair.com/bioscierep/article-pdf/40/6/BSR-20191370_EOC/885136/bsr-2019-1370-eoc.pdf) by guest on 09 April 2024

Version of Record published:  
22 June 2020
